# Supplementary material for: Reusable CoxNi1−x dye adsorbents as supercapacitor electrode materials
Source: Royal Society of Chemistry journal article supplement (doi:10.1039/c7ta00578d), 2017-01-01
Supplement: c7ta00578d1.pdf [file c7ta00578d1.pdf]

## Supplementary Information for

### Reusable $\text{Co}_x\text{Ni}_{1-x}$ dye adsorbents as supercapacitor electrode materials

Haiming Sun<sup>a‡</sup>, Xijia Yang<sup>a‡</sup>, Lishu Zhang<sup>b</sup>, Lijun Zhao<sup>\*a</sup> and Jianshe Lian<sup>\*a</sup>

<sup>a</sup> Key Lab of Automobile Materials, Ministry of Education, College of Materials Science and Engineering, Jilin University, Nanling Campus, Changchun, 130025, P. R. China. E-mail: lijunzhao@jlu.edu.cn; lianjs@jlu.edu.cn; Fax: +86-431-85095876; Tel: +86-431-85095878; +86-431-85095875

<sup>b</sup> Institute of Advanced Materials for Nano-Bio Applications, School of Ophthalmology & Optometry, Eye Hospital, Wenzhou Medical University, 270 Xueyuan Xi Road, Wenzhou, Zhejiang, 325027, PR China.

‡ These authors contributed equally to this work.

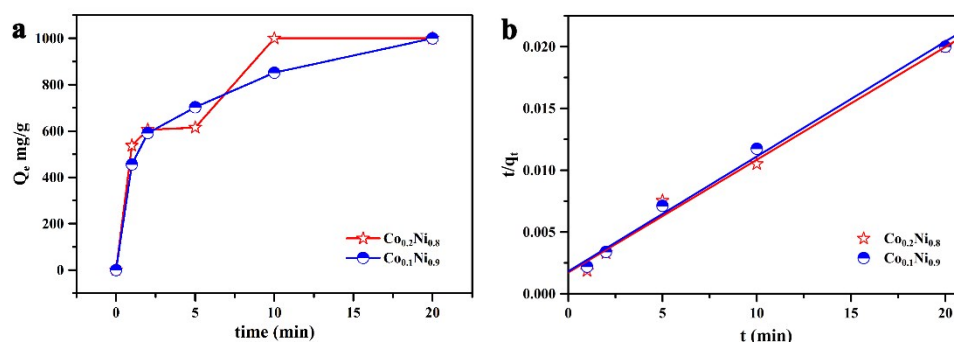

**Fig. S1** a) Adsorption isotherm and b) Pseudo-second-order adsorption kinetic for adsorption of CR by the as-synthesized  $\text{Co}_{0.2}\text{Ni}_{0.8}$  and  $\text{Co}_{0.1}\text{Ni}_{0.9}$  binary metallic alloys. (Initial dye concentration  $100 \text{ mg L}^{-1}$ , pH is about 7.5, temperature  $25 \text{ }^\circ\text{C}$ )

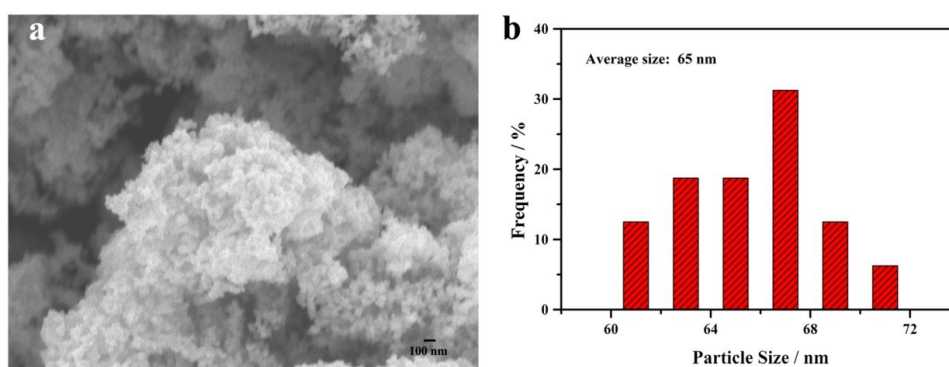

**Fig. S2** FE-SEM image and particles sizes distribution of as-synthesized  $\text{Co}_{0.2}\text{Ni}_{0.8}$  alloy without additional treatment. (The particle sizes are calculated by Nano Measurer 1.2).

**Table S1** The weight percentage of each element calculated by EDS spectrum.

| Element | C     | O     | S    | Co    | Ni    |
|---------|-------|-------|------|-------|-------|
| wt%     | 12.63 | 24.24 | 1.40 | 14.66 | 47.07 |

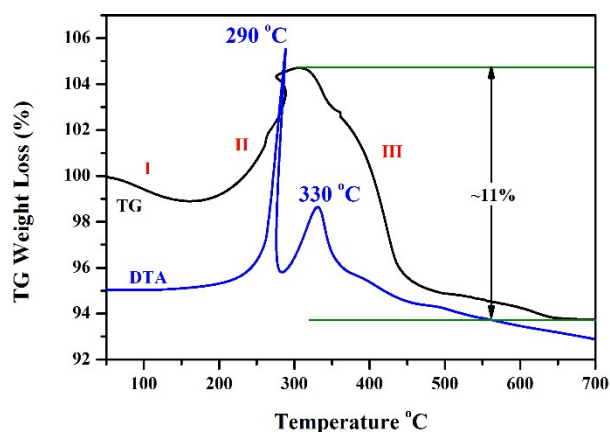

**Fig. S3** TG-DTA curves of the M/MO@C-600 composite recorded under air atmosphere (flow rate: 100 mL min<sup>-1</sup>) from room temperature to 700 °C with a temperature ramp 10 °C min<sup>-1</sup>.

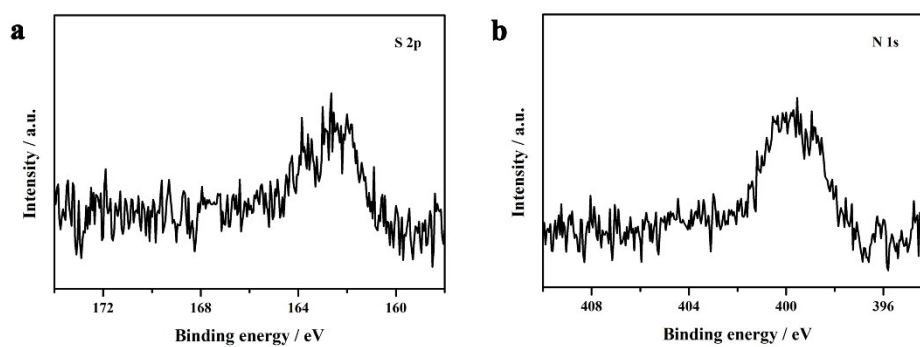

**Fig. S4** XPS spectra of a) S 2p and b) N 1s.

**Table S2** The atomic percentage of each element calculated by XPS spectrum.

| Element | C     | O     | N    | S    | Co   | Ni   |
|---------|-------|-------|------|------|------|------|
| at%     | 73.94 | 18.71 | 0.48 | 0.71 | 1.24 | 4.92 |

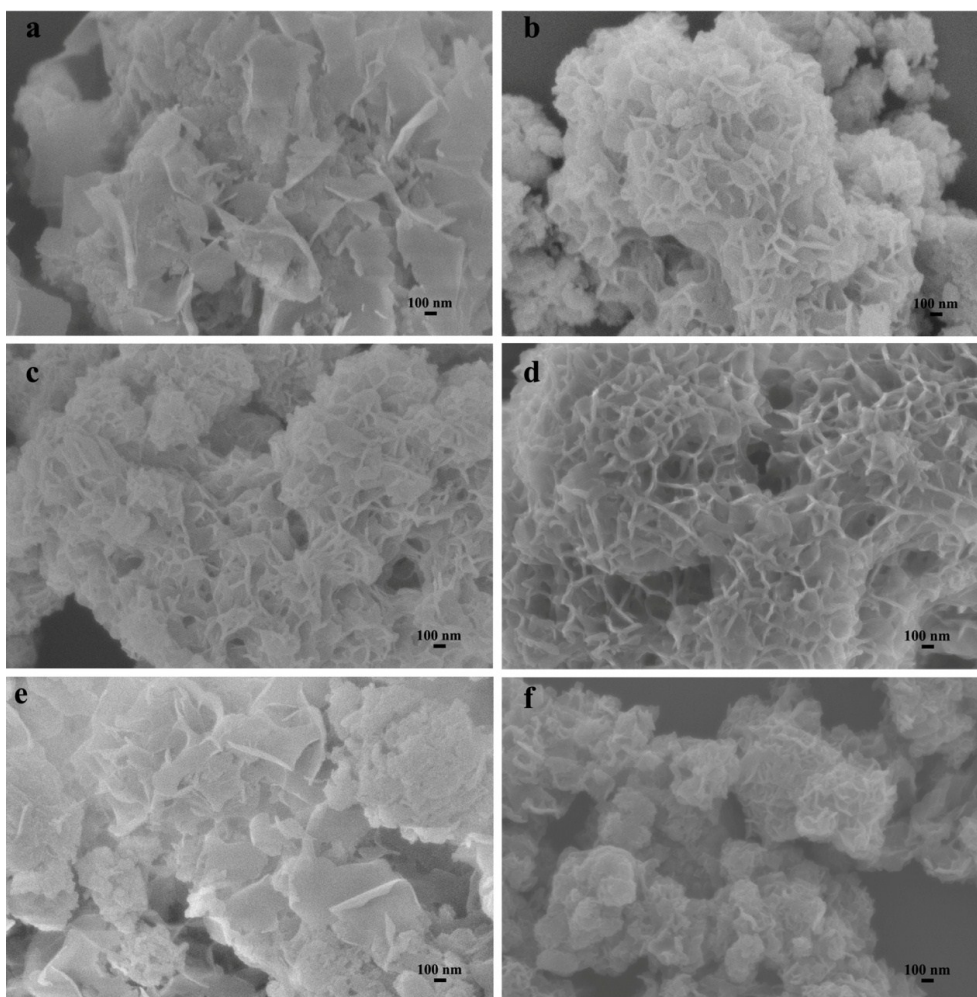

**Fig. S5** FE-SEM images of M/MO@C composites with the M constituent of: a) Co, b) Co<sub>0.6</sub>Ni<sub>0.4</sub>, c) Co<sub>0.4</sub>Ni<sub>0.6</sub>, d) Co<sub>0.2</sub>Ni<sub>0.8</sub> (M/MO@C-600), e) Co<sub>0.1</sub>Ni<sub>0.9</sub> and f) Ni. (Calcination temperature: 600 °C)

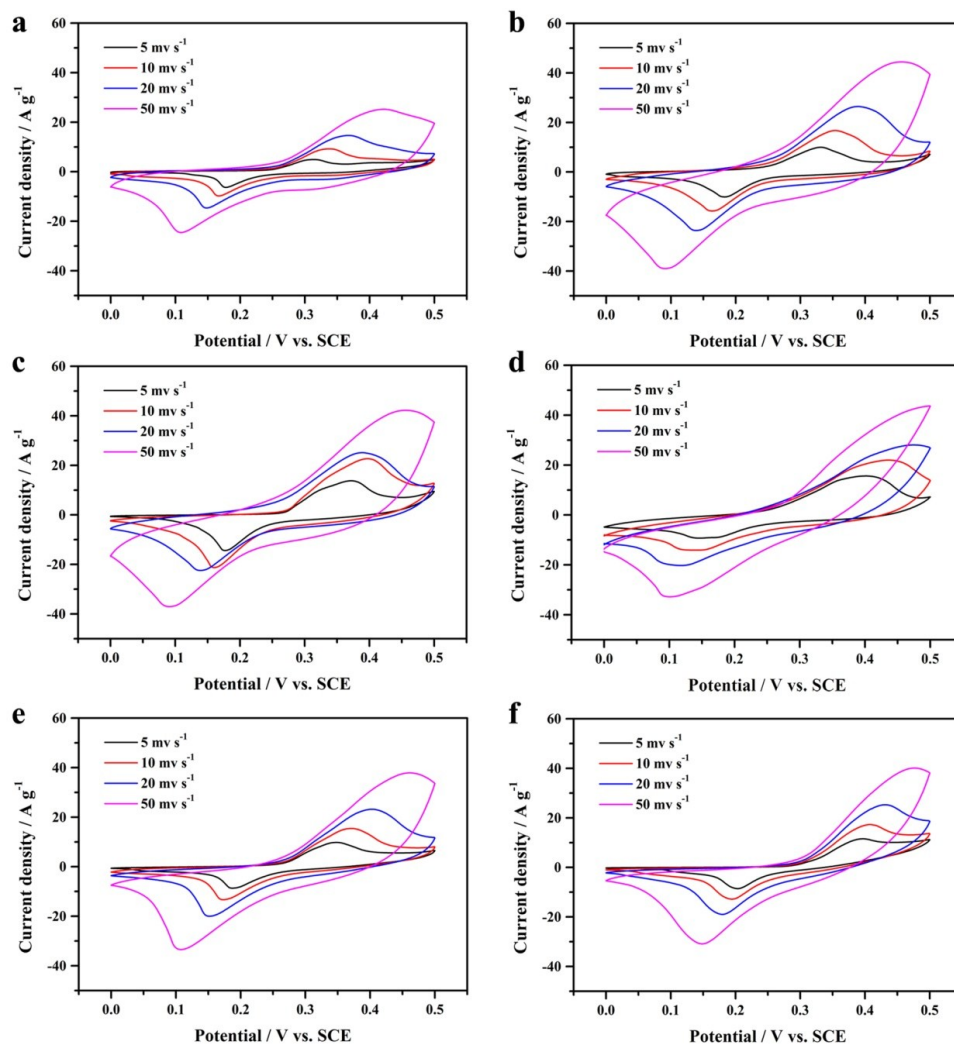

**Fig. S6** CV curves of M/MO@C composites with the M constituent of: a) Co, b) Co<sub>0.6</sub>Ni<sub>0.4</sub>, c) Co<sub>0.4</sub>Ni<sub>0.6</sub>, d) Co<sub>0.2</sub>Ni<sub>0.8</sub> (M/MO@C-600), e) Co<sub>0.1</sub>Ni<sub>0.9</sub> and f) Ni. (Calcination temperature: 600 °C)

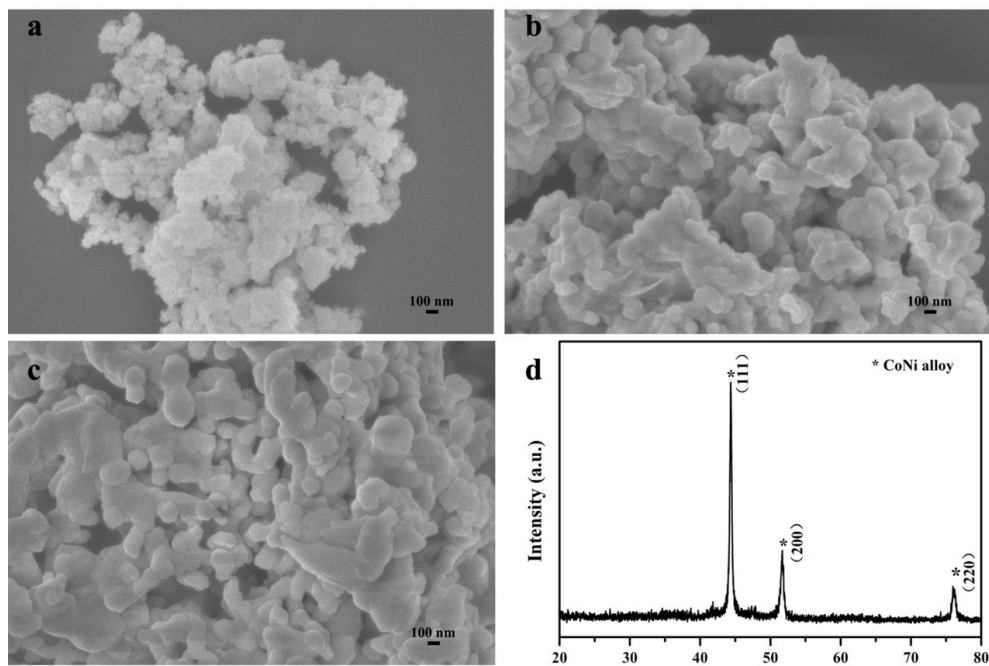

**Fig. S7** FE-SEM images of a) M-500, b) M-600, c) M-700; d) XRD profile of M-600.

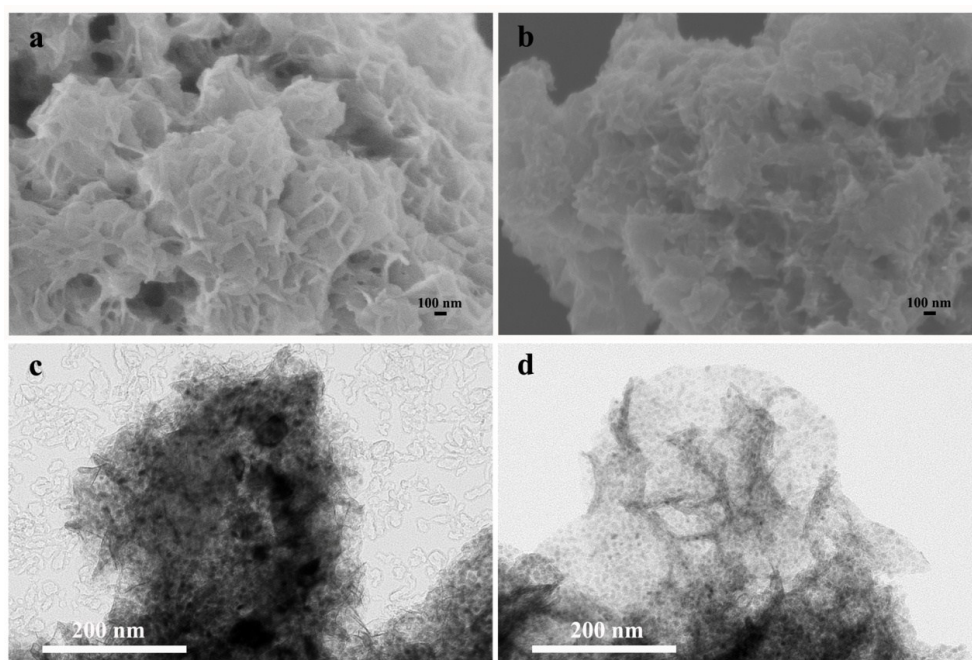

**Fig. S8** FE-SEM images of a) M/MO@C-500 and b) M/MO@C-700; TEM images of c) M/MO@C-500 and d) M/MO@C-700.

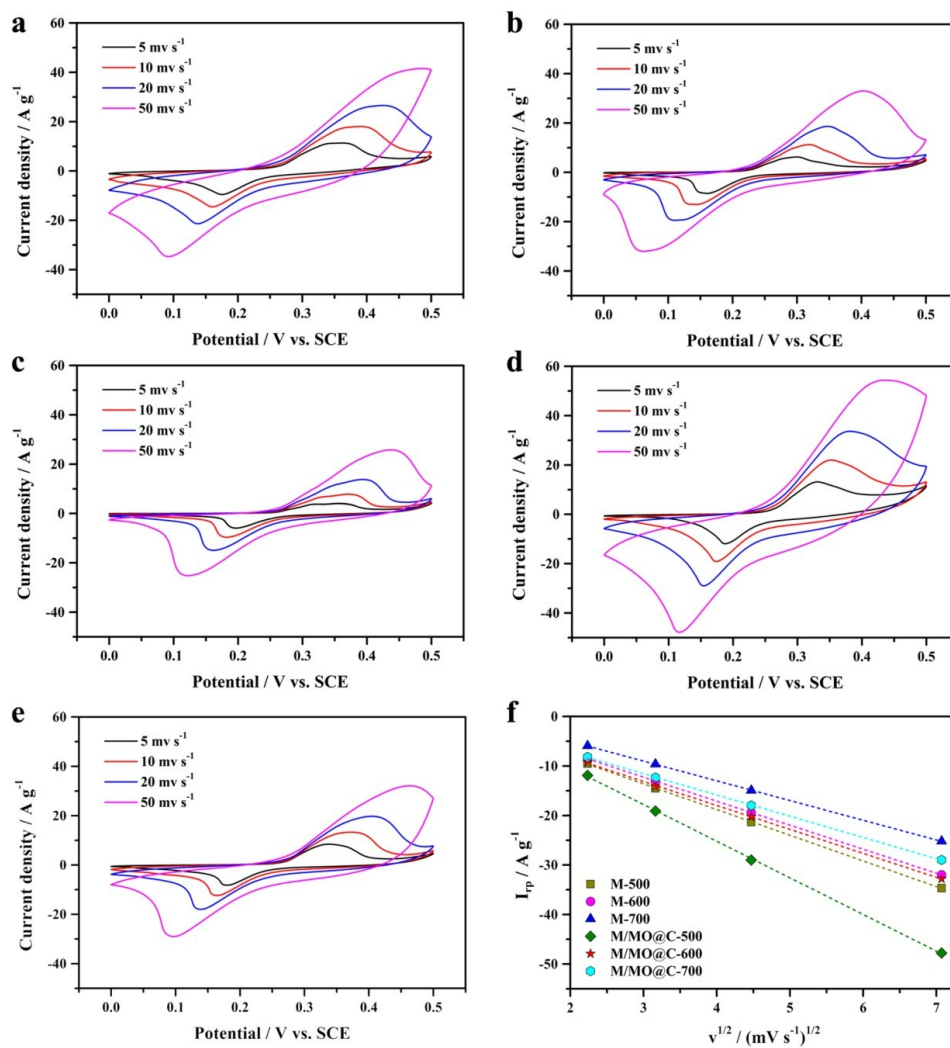

**Fig. S9** CV curves of a) M-500, b) M-600, c) M-700, d) M/MO@C-500 and e) M/MO@C-700; f) Corresponding  $I_{p}-v^{1/2}$  plots.

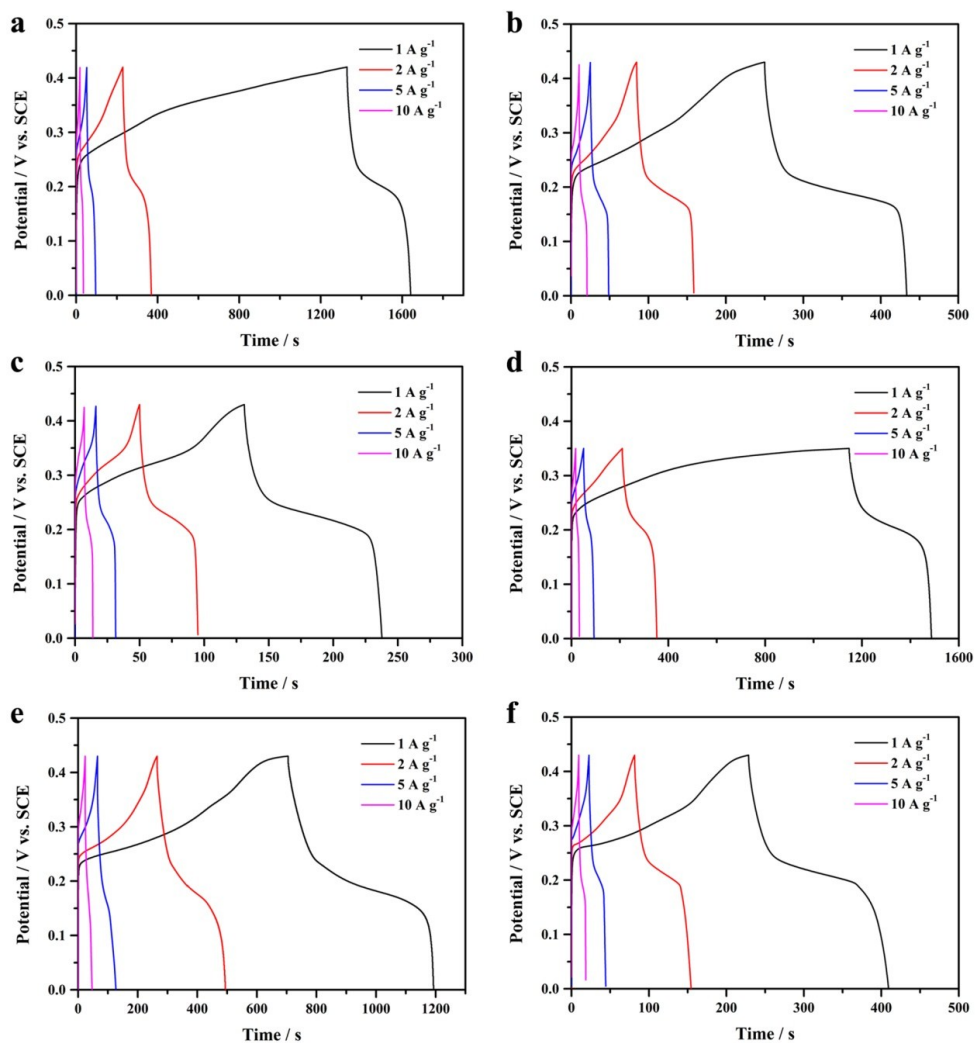

**Fig. S10** Galvanostatic charge/discharge curves of a) M-500, b) M-600, c) M-700, d) M/MO@C-500, e) M/MO@C-600 and f) M/MO@C-700.

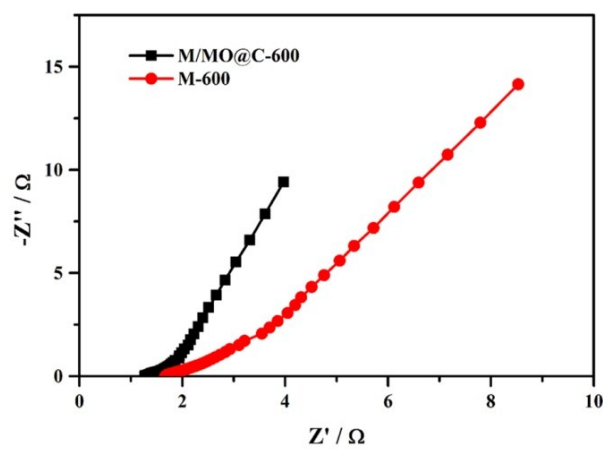

**Fig. S11** EIS spectra of the M/MO@C-600 and M-600 composites.

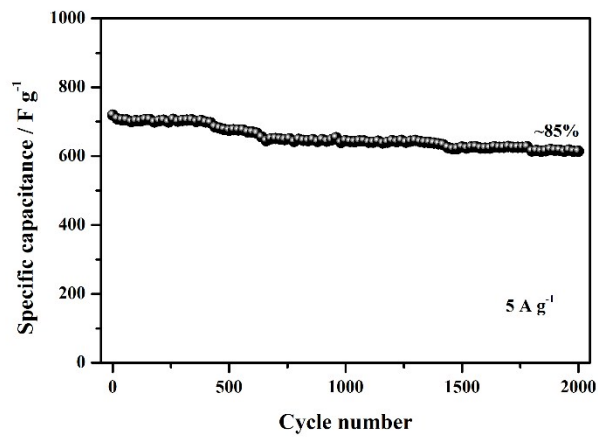

**Fig. S12** Cycling performance of M/MO@C-600 composite in the three-electrode system at a current density of 5 A g<sup>-1</sup>.

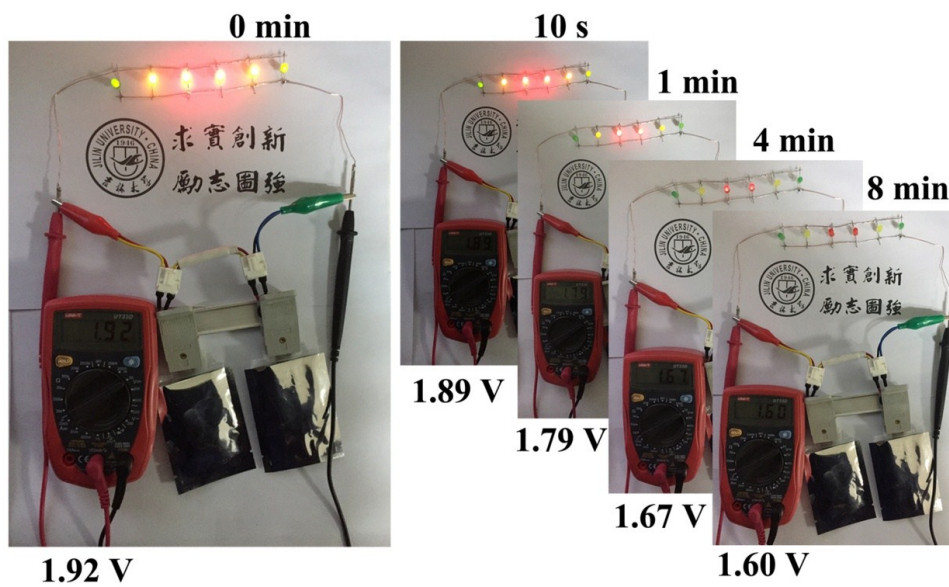

**Fig. S13** Time-dependence optical images of two serially connected M/MO@C-600//AC supercapacitors lighting up six parallel connected LED indicators.
